# Supplementary material for: New acentric materials constructed from aminopyridines and 4-nitrophenol
Source: Royal Society of Chemistry journal article supplement (doi:10.1039/c3ce40291f), 2013-01-01
Supplement: c3ce40291f.pdf [file c3ce40291f.pdf]

## SUPPLEMENTARY MATERIALS FOR MANUSCRIPT

### New Acentric Materials Constructed From Aminopyridines and 4-Nitrophenol

Sergiu Draguta,<sup>a</sup> Marina S. Fonari,<sup>a,b\*</sup> Artëm E. Masunov,<sup>c</sup> Joel Zazueta,<sup>a</sup> Shannon Sullivan,<sup>c</sup> Mikhail Yu. Antipin,<sup>a,d</sup> Tatiana V. Timofeeva<sup>a</sup>

<sup>a</sup>Department of Chemistry & Biology, New Mexico Highlands University, Las-Vegas, NM 87701, USA

<sup>b</sup>Institute of Applied Physics Academy of Sciences of Moldova, Academy str., 5 MD2028, Chisinau, Moldova

<sup>c</sup>NanoScience Technology Center, Department of Chemistry, Department of Physics, and Florida Solar Energy Center, University of Central Florida, Orlando, FL 32825, USA

<sup>d</sup>A.N. Nesmeyanov Institute of Organoelement Compounds, Russian Academy of Sciences, Vavilova str. 28, 119991 Moscow, Russia

**Table 1S.** Selected observed IR bands ( $\nu$ ,  $\text{cm}^{-1}$ ) for adducts studied

| 2(I)•1 | 2(I)•2 | 2(I)•3 | I•4  | 2(I)•5 | 2(I)•6 | Assignment                                                |
|--------|--------|--------|------|--------|--------|-----------------------------------------------------------|
| -      | 3446   | -      | 3460 | 3430   | 3485   | N-H stretching, O-H vibration, H-bond formation           |
| 3375   | 3377   | -      | 3376 | 3339   | 3378   | NH <sub>2</sub> asymmetric stretching mode                |
| -      | 3286   | 3316   | -    | 3221   | 3312   | NH <sub>2</sub> symmetric stretching mode                 |
| 3089   | 3070   | -      | -    | -      | -      | aromatic CH stretching mode                               |
| -      | 1616   | 1612   | -    | 1695   | 1632   | pyridine ring stretching vibration                        |
| 1573   | 1562   | 1586   | 1585 | 1567   | 1572   | NO <sub>2</sub> asymmetric stretching                     |
| 1321   | -      | 1322   | 1330 | 1326   | 1328   | NO <sub>2</sub> symmetric stretching, C-N stretching mode |
| 1239   | 1247   | 1215   | 1241 | 1246   | 1243   | C-O stretching vibration for substituted phenols          |
| 1153   | 1137   | 1165   | -    | 1175   | -      | NH <sub>2</sub> rocking mode; O-H-in plane bending        |
| 1098   | -      | -      | 1110 | 1101   | 1104   | C-C-N asymmetric stretch, ring stretching                 |
| 847    | -      | 848    | 842  | 859    | 849    | NH <sub>2</sub> out-of plane bending mode                 |
| 755    | -      | 753    | -    | 754    | 755    | out-of-plane ring deformation mode                        |
| 697    | 668    | -      | 687  | 694    | -      | C-H out-of-plane deformation mode                         |

**Table 2S. Selected Structural Data for Multicomponent Complexes Containing 4-Nitrophenol.**

| Compound                                                                                                                        | Sp. Gr.      | CSD code           | Reference        |
|---------------------------------------------------------------------------------------------------------------------------------|--------------|--------------------|------------------|
| 4-Aminopyridine                                                                                                                 | $P2_12_12_1$ | AMPYRE             | [71]             |
| 3,4-Diaminopyridine                                                                                                             | $P2_12_12_1$ | REWBOL             | [72]             |
| 2,3-Diaminopyridine                                                                                                             | $P4_2bc$     | EVODEZ             | [73]             |
| 3-Aminopyridine                                                                                                                 | $Cc$         | AMIPYR             | [74]             |
| 2-Amino,6-methylpyridine                                                                                                        | $P2_1/c$     | -                  | [75]             |
| 2,4-Diaminopyrimidine acetone solvate                                                                                           | $P2_1/c$     | -                  | [76]             |
| <b>4-Aminopyridinium 4-nitrophenolate 4-nitrophenol</b>                                                                         | $P2_1$       | -                  | <b>This work</b> |
| <b>2-Amino,6-methylpyridinium 4-nitrophenolate 4-nitrophenol</b>                                                                | $Pna2_1$     | -                  | <b>This work</b> |
| <b>3,4-Diaminopyridinium 4-nitrophenolate 4-nitrophenol</b>                                                                     | $P2_1$       | -                  | <b>This work</b> |
| <b>2,3-Diaminopyridinium 4-nitrophenolate 4-nitrophenol</b>                                                                     | $P2_1$       | -                  | <b>This work</b> |
| 4-(Dimethylamino)pyridinium 4-nitrophenolate 4-nitrophenol                                                                      | $P2_12_12_1$ | PUMQAP<br>PUMQAP01 | [49]<br>[77]     |
| 2-Aminopyridinium 4-nitrophenolate 4-nitrophenol                                                                                | $Pna2_1$     | KAPFEN             | [50]             |
| 2,6-Diaminopyridinium 4-nitrophenolate 4-nitrophenol                                                                            | $Pna2_1$     | KAPFIR             | [50]             |
| <i>L</i> -Histidine-4-nitrophenolate 4-nitrophenol                                                                              | $P2_1$       | EMUROU             | [53]             |
| <i>L</i> -Arginine 4-nitrophenolato 4-nitrophenol dihydrate                                                                     | $P2_1$       | -                  | [56]             |
| 1,5,7-Triazabicyclo(4.4.0)dec-5-ene bis(4-nitrophenol)                                                                          | $P2_1$       | OFECAD             | [78]             |
| <b>2,3-Diaminopyrimidinium 4-nitrophenolate 4-nitrophenol</b>                                                                   | $P2_1/c$     | -                  | <b>This work</b> |
| 1,3,5-triazine-2,4,6-triamine bis(4-nitrophenol) monohydrate                                                                    | $P-1$        | XECBEON            | [70]             |
| Imidazolium 4-nitrophenolate 4-nitrophenol monohydrate                                                                          | $P2_1/c$     | HILMAR             | [79]             |
| 2-( <i>N,N</i> -Diethylamino)methyl-4-nitrophenol 4-nitrophenol                                                                 | $Pbca$       | NUDLON             | [80]             |
| Hexa-aqua-(4-nitrophenol- <i>O</i> )-calcium bis(4-nitrophenolate) 4-nitrophenol dihydrate                                      | $P2_1/n$     | FEDWIU             | [81]             |
| Hexa-aqua-(4-nitrophenol- <i>O,O'</i> )-strontium bis(4-nitrophenolate) 4-nitrophenol dihydrate                                 | $P2_1/c$     | FEDWUG             | [81]             |
| (4-Nitrophenolato)-(tetramethylethylenediamine)-methyl-palladium(II) 4-nitrophenol solvate                                      | $P2_1/c$     | ZIHWOC             | [82]             |
| Dimethylammonium 4-nitrophenolate 4-nitrophenol                                                                                 | $P2_1/n$     | KUSWOL             | [83]             |
| (3-Pyridyl)methanaminium 4-nitrophenolate 4-nitrophenol                                                                         | $P-1$        | QUYZOA             | [84]             |
| <i>L</i> -Tryptophan (tris)(4-nitrophenol solvate)                                                                              | $P2_1$       | LAQXIM             | [85]             |
| <b>3-Aminopyridine 4-nitrophenol</b>                                                                                            | $P2_1$       | -                  | <b>This work</b> |
| 4-Pyridone 4-nitrophenol                                                                                                        | $Pna2_1$     | PUMQET             | [49]             |
| <i>L</i> -Argininium 4-nitrophenolate monohydrate                                                                               | $P2_12_12_1$ | OFIWUW             | [55]             |
| <i>L</i> -Phenylalanine 4-nitrophenol                                                                                           | $P2_1$       | XETLIS             | [86]             |
| 4-Nitropyridine <i>N</i> -oxide 4-nitrophenol                                                                                   | $Pna2_1$     | JUDNAX             | [87]             |
| 2-Pyridone 4-nitrophenol                                                                                                        | $P2_1/c$     | OFUGUR             | [88]             |
| Pyridine <i>N</i> -oxide 4-nitrophenol                                                                                          | $P2_1/c$     | NILZOX             | [89]             |
| 2-Picoline <i>N</i> -oxide 4-nitrophenol                                                                                        | $P2_1/c$     | WIRWID             | [90]             |
| 4-Methylpyridine 4-nitrophenol                                                                                                  | $Pbca$       | CAXNOE             | [91]             |
| Acetamide 4-nitrophenol                                                                                                         | $P2_1/c$     | LOCHOB             | [92]             |
| <i>Cis,trans</i> -Diacetamide 4-nitrophenol                                                                                     | $P-1$        | VIVYUU             | [93]             |
| <i>N</i> -Butyrylbenzamide 4-nitrophenol                                                                                        | $P-1$        | VIVZAB             | [93]             |
| Urea 4-nitrophenol                                                                                                              | $P-1$        | GAVHUH             | [94]             |
| 2,3,5,6-Tetramethylpyrazine 4-nitrophenol                                                                                       | $P-1$        | FIQBAJ             | [95]             |
| Methylammonium nitrophenolate                                                                                                   | $Pbca$       | NUZKAU             | [96]             |
| 1-Adamantylammonium 4-nitrophenolate monohydrate                                                                                | $P2_1/n$     | FIRNEA             | [97]             |
| Benzyltrimethylammonium <i>p</i> -nitrophenolate trihydrate                                                                     | $P2_12_12_1$ | FITZEN             | [98]             |
| <i>O</i> -(1-adamantoyl)- <i>N</i> -(9-anthracenylmethyl)dihydrocinchoninium 4-nitrophenolate acetonitrile solvate tetrahydrate | $P2_12_12_1$ | HEXPOQ             | [99]             |
| <i>O</i> -Allyl-9-anthracenylmethyl cinchonidinium <i>p</i> -nitrophenoxide dichloromethane solvate                             | $P2_12_12_1$ | NEDDEF             | [100]            |
| Theophylline <i>p</i> -nitrophenol                                                                                              | $P-1$        | TOPPNP             | [101]            |

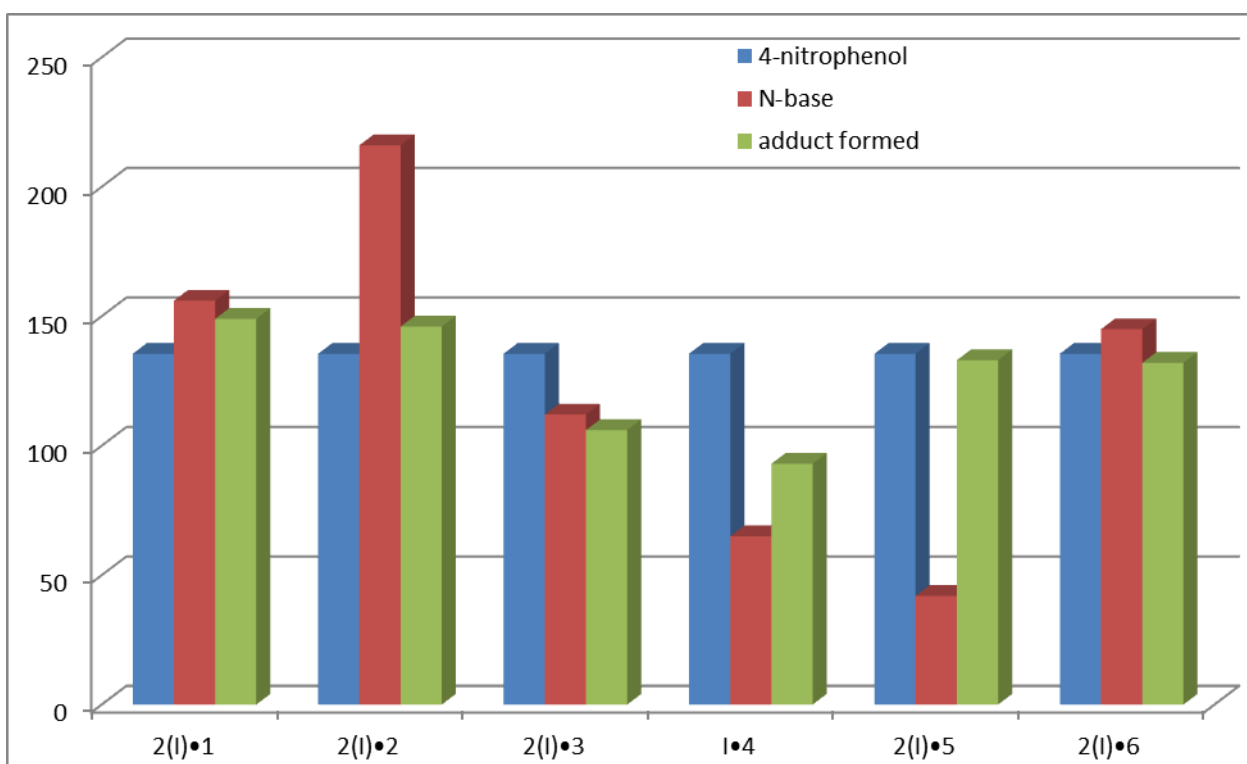

Fig. 1S. Melting points for new and initial compounds.

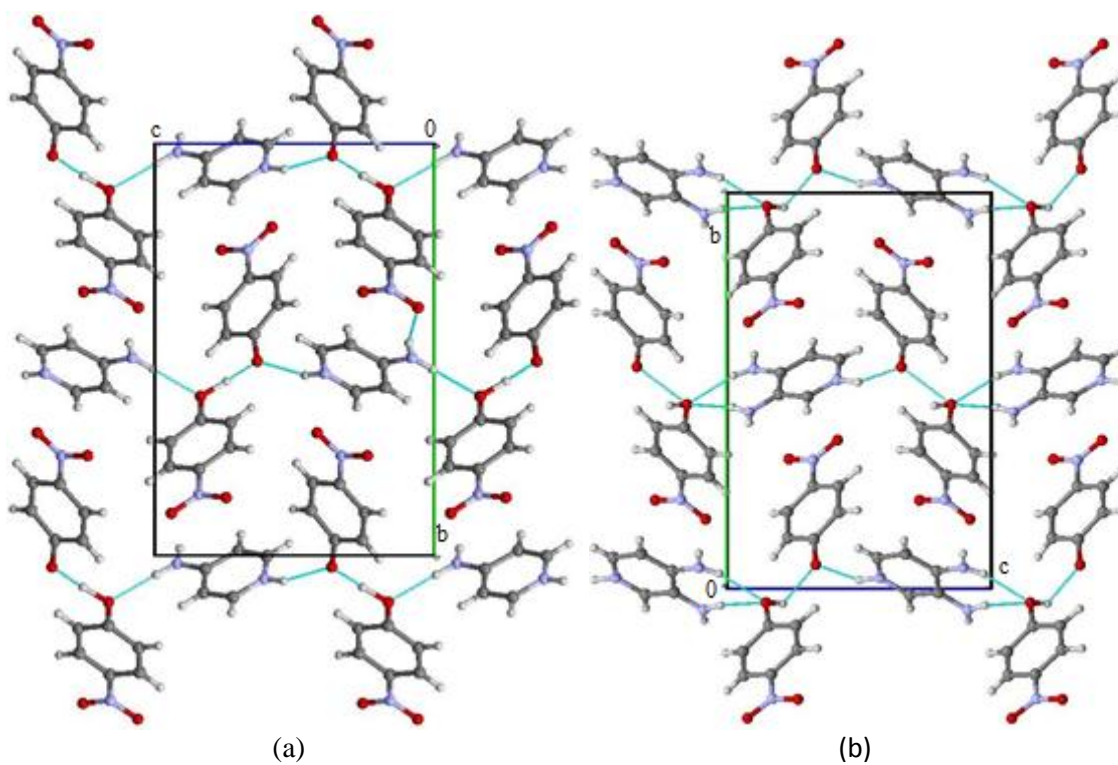

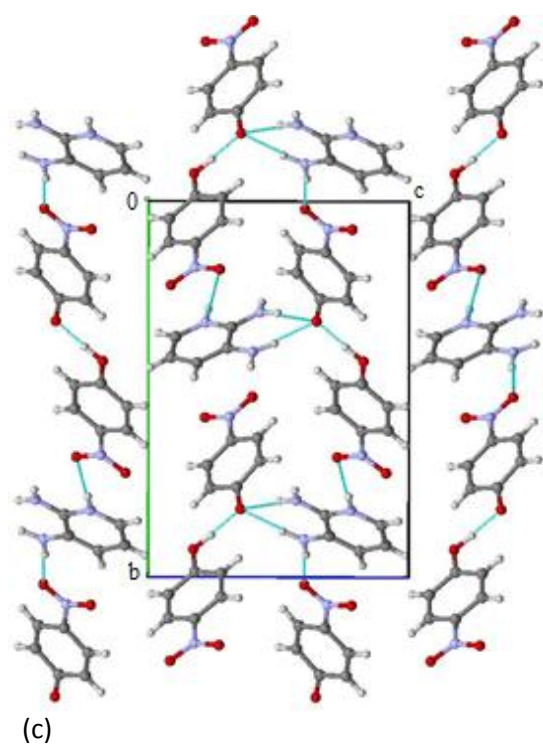

**Figure 2S.** Fragments of crystal packing in 2(I)•1(a), 2(I)•2 (b), 2(I)•3 (c).

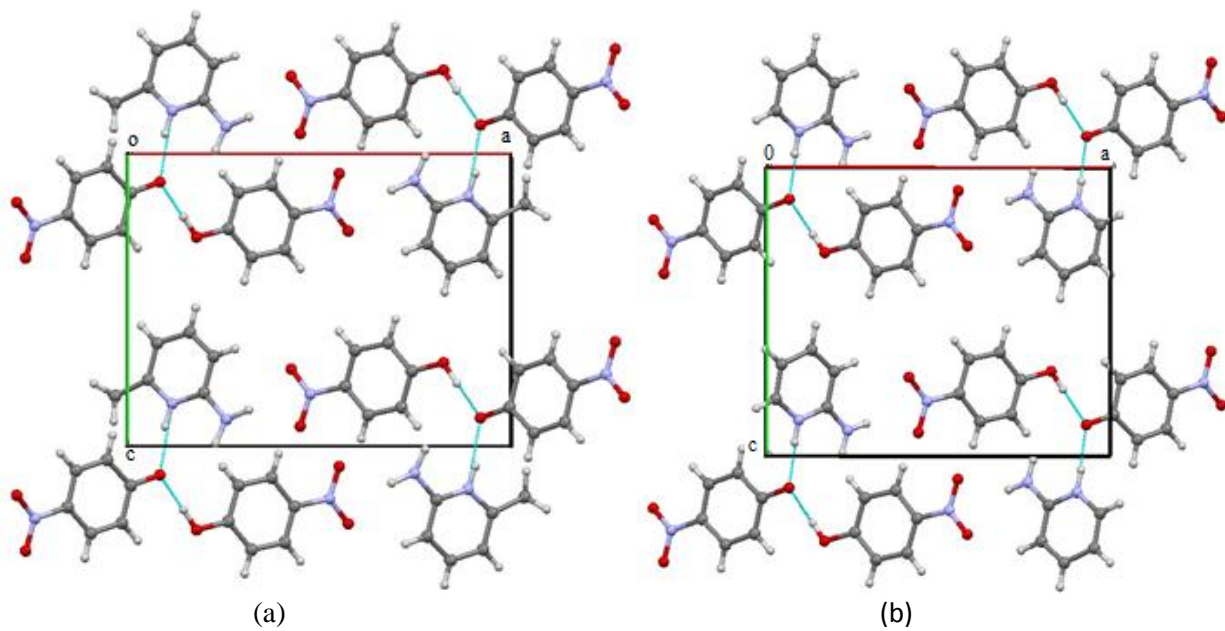

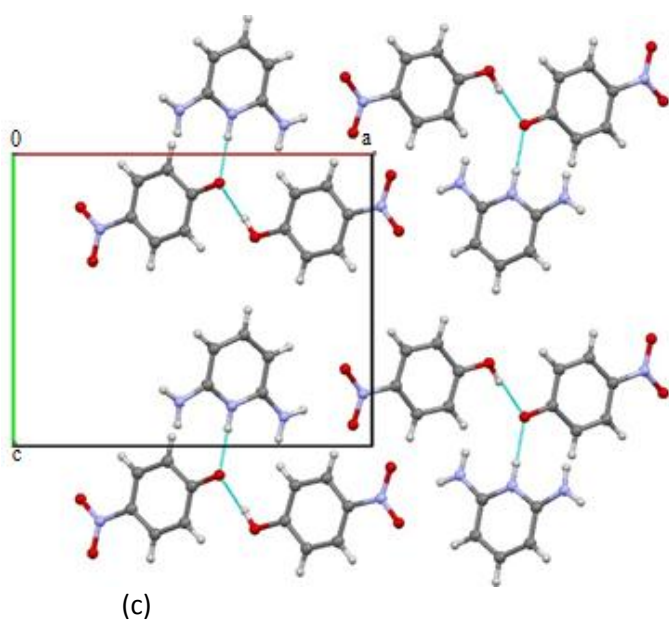

**Figure 3S.** Fragments of crystal packing in 2(I)•5 (a), KAPFEN(b) and KAPFIR(c) [50].
